# Supplementary material
Source: PubMed Central journal article supplement (PMC3601678)
Supplement: NIHMS440415-supplement-Supporting_Information.pdf [file NIHMS440415-supplement-Supporting_Information.pdf]

## **Supporting Information**

### **Comparative Study of the Binding of Concanavalin A to Monolayers Containing a Thiolated Mannoside on Flat Gold and on Nanoporous Gold.**

Binod Pandey<sup>1,2</sup>, Yih Horng Tan<sup>1,2</sup>, Kohki Fujikawa<sup>1</sup>, Alexei V. Demchenko<sup>1</sup> and Keith J. Stine<sup>1,2,\*</sup>

<sup>1</sup>Department of Chemistry and Biochemistry, University of Missouri – Saint Louis, Saint Louis, MO 63121, USA

<sup>2</sup>Center for Nanoscience, University of Missouri – Saint Louis, Saint Louis, MO 63121, USA

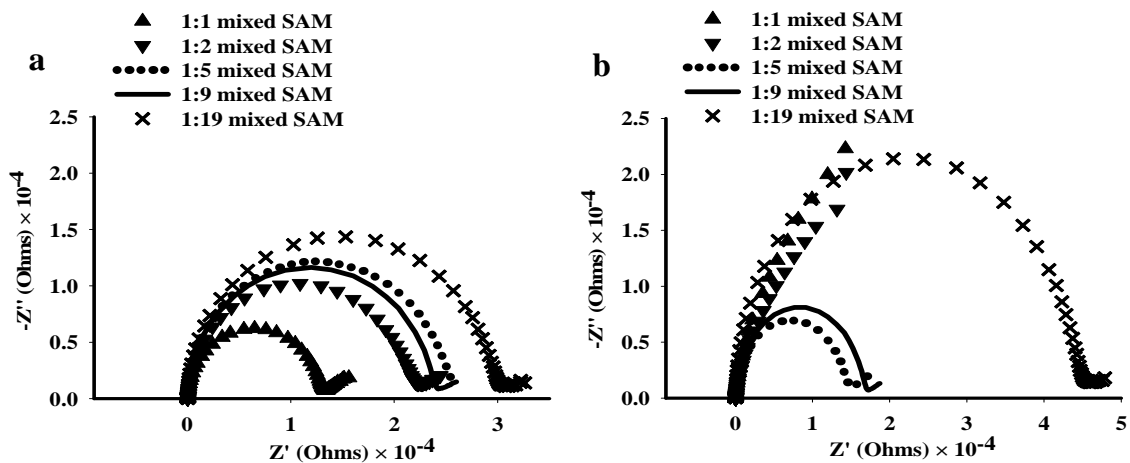

Figure S1. Representative Nyquist plots for different ratio mixed SAMs of OCT and thiolated  $\alpha$ -mannoside on gold wire (a), and on NPG (b). EIS measurements were done in 10 mM  $\text{Fe}(\text{CN})_6^{3-/4-}$  from 0.1 Hz to 0.1 MHz

## Synthesis of 8-mercaptooctyl $\alpha$ -D-mannopyranoside

*General.* Column chromatography was performed on silica gel 60 (70 - 230 mesh), reactions were monitored by TLC on Kieselgel 60 F<sub>254</sub>. The compounds were detected by examination under UV light and by charring with 10% sulfuric acid in methanol. Solvents were removed under reduced pressure at < 40 °C. CH<sub>2</sub>Cl<sub>2</sub>, ClCH<sub>2</sub>CH<sub>2</sub>Cl, and CH<sub>3</sub>CN were distilled from CaH<sub>2</sub> directly prior to application. Molecular sieves (3 Å or 4 Å), used for reactions, were crushed and activated *in vacuo* at 390°C during 8 h in the first instance and then for 2-3 h at 390 °C directly prior to application. AgOTf was co-evaporated with toluene and was dried *in vacuo* during 2-3 h prior to application. Optical rotations were measured using 'Jasco P-1020' polarimeter. <sup>1</sup>H-n.m.r. spectra were recorded in CDCl<sub>3</sub> at 300 MHz (Bruker Avance), <sup>13</sup>C-NMR spectra were recorded in CDCl<sub>3</sub> at 75 MHz (Bruker Avance). HRMS determinations were made with the use of JEOL MStation (JMS-700) Mass Spectrometer.

**8-Bromooctyl 2,3,4,6-tetra-O-acetyl- $\alpha$ -D-mannopyranoside (1).** To a stirring solution of 1,2,3,4,6-penta-*O*-acetyl-D-mannopyranose (4.0 g, 10.3 mmol), 8-bromooctanol (2.6 mL, 12.3 mmol) and molecular sieves 4 Å (1 g) in dichloromethane (100 mL) BF<sub>3</sub>·OEt<sub>2</sub> (9.5 mL, 77.3 mmol) was added dropwise at 0 °C. The reaction mixture was allowed to warm to room temperature and stirred for 48 hours. The resulting mixture was neutralized by addition of Et<sub>3</sub>N (20 mL) at 0 °C. The solids were filtered off, washed successively with dichloromethane, and the combined filtrate (~200 mL) was washed with sat. aq. NaHCO<sub>3</sub> (100 mL) and water (3 x 100 mL). The organic layer was separated, dried with MgSO<sub>4</sub>, and concentrated *in vacuo*. The residue was purified by column chromatography on silica gel (ethyl acetate / hexane, 1/4, v/v isocratic elution) to give the title compound as a colorless foam (2.5 g, 45%). Analytical data for

**1:**  $R_f = 0.65$  (ethyl acetate / hexane, 1/2, v/v);  $[\alpha]_D^{24} +3.5$  ( $c$  0.7,  $\text{CHCl}_3$ );  $^1\text{H-NMR}$  (300 MHz,  $\text{CDCl}_3$ ):  $\delta$ , 1.29-1.87 (m, 12 H,  $-\text{CH}_2- \times 6$ ), 1.96 (s, 3 H, Ac), 2.01 (s, 3 H, Ac), 2.07 (s, 3 H, Ac), 2.12 (s, 3 H, Ac), 3.35-3.44 (m, 3 H,  $\text{CH}_2\text{Br}$ ,  $-\text{OCH}_2^{\text{a}}$ -), 3.60-3.68 (m, 1 H,  $-\text{OCH}_2^{\text{b}}$ -), 3.91-3.97 (m, 1 H, H-5), 4.06 (dd, 1 H,  $J_{5,6a} = 2.2$  Hz,  $J_{6a,6b} = 12.2$  Hz, H-6a), 4.24 (dd, 1 H, H-6b), 4.76 (d, 1 H, H-1), 5.18-5.20 (m, 1 H, H-2), 5.27 (t, 1 H,  $J_{3,4} = J_{4,5} = 9.0$  Hz, H-4), 5.32 (dd, 1 H,  $J_{2,3} = 3.0$  Hz, H-3) ppm;  $^{13}\text{C-NMR}$  (75 MHz,  $\text{CDCl}_3$ ):  $\delta$ , 20.9, 21.0, 21.1, 26.2, 28.3, 28.8, 29.3, 29.4, 32.9, 34.2, 62.7, 66.4, 68.6, 68.7, 69.3, 69.9, 97.7, 169.9, 170.1, 170.3, 170.9 ppm; HR-FAB MS  $[\text{M} + \text{Na}]^+$  calcd for  $\text{C}_{22}\text{H}_{35}\text{BrO}_{10}\text{Na}^+$  561.1311, found 561.1310.

**8-(Acetylthio)octyl 2,3,4,6-tetra-O-acetyl- $\alpha$ -D-mannopyranoside (2).** To a solution of compound **1** (2.5 g, 4.65 mmol) in DMF (23 mL) was added potassium thioacetate (636 mg, 5.58 mmol) at room temperature and the resulting mixture was stirred at 50 °C for 5 hours. The reaction mixture was extracted with ethyl acetate (100 mL) and washed with sat. aq.  $\text{NaHCO}_3$  (100 mL) and ice-cold  $\text{H}_2\text{O}$  (3 x 100 mL). The organic layer was separated, dried with  $\text{MgSO}_4$ , and concentrated *in vacuo*. The residue was purified by column chromatography on silica gel (ethyl acetate / hexane, 1/3, v/v isocratic elution) to give the title compound as a colorless foam (2.0 g, 80%). Analytical data for **2:**  $R_f = 0.55$  (ethyl acetate / hexane, 1/2, v/v);  $[\alpha]_D^{24} +42.5$  ( $c$  1.0,  $\text{CHCl}_3$ );  $^1\text{H-NMR}$  (300 MHz,  $\text{CDCl}_3$ ):  $\delta$ , 1.25-1.68 (m, 12 H,  $-\text{CH}_2- \times 6$ ), 2.08 (s, 3 H, Ac), 2.13 (s, 3 H, Ac), 2.15 (s, 3 H, Ac), 2.29 (s, 3 H, Ac), 2.84 (t, 2 H,  $-\text{CH}_2\text{-SAc}$ ), 2.86-3.45 (m, 1 H,  $-\text{OCH}_2-$ ), 3.60-3.68 (m, 1 H,  $-\text{OCH}_2-$ ), 3.92-4.06 (m, 1 H, H-5), 4.24 (dd, 1 H,  $J_{6,6'} = 12.2$  Hz,  $J_{6,5} = 2.3$  Hz H-6), 4.28 (dd, 1 H, H-6'), 4.77 (d, 1 H,  $J_{1,2} = 1.4$  Hz, H-1), 5.19-5.21 (m, 1 H, H-2), 5.24 (t, 1 H, H-4), 5.33 (dd, 1 H,  $J_{2,3} = 3.4$  Hz,  $J_{3,4} = 9.9$  Hz, H-3) ppm;  $^{13}\text{C-NMR}$  (75 MHz,  $\text{CDCl}_3$ ):  $\delta$ , 20.8, 20.9, 21.1, 26.1, 28.9, 29.1, 29.2, 29.3, 29.4, 29.6, 30.8, 62.6, 66.4, 68.5, 68.6,

69.3, 69.8, 97.7, 169.9, 170.0, 170.2, 170.8, 196.2 ppm; HR-FAB MS  $[M + Na]^+$  calcd for  $C_{24}H_{38}O_{11}SNa^+$  557.2033, found 557.2041.

**8-Mercaptooctyl  $\alpha$ -D-mannopyranoside (3).** To a solution of **2** (777 mg, 1.45 mmol) in MeOH/THF (14 mL, 1/1, v/v) NaOMe (29 mg, 0.15 mmol) was added and the reaction mixture was stirred at room temperature for 3 hours. The resulting mixture was neutralized with Dowex ( $H^+$ ). The resin was filtered off, rinsed successively with MeOH, and the combined filtrate (~100 mL) was concentrated *in vacuo*. The residue was purified by column chromatography on silica gel (dichloromethane / methanol, 10/1 isocratic elution) to give the title compound as a colorless foam (400 mg, 85%). Analytical data for **3**:  $R_f = 0.25$  (dichloromethane / methanol, 10/1, v / v);  $[\alpha]_D^{24} -12.3$  (c 0.8, MeOH);  $^1H$ -NMR (300 MHz,  $CD_3OD/CDCl_3$ ):  $\delta$ , 1.24-1.53 (m, 12 H,  $-CH_2-$   $\times$  6), 2.37-2.57 (m, 2 H,  $-CH_2SH$ ), 3.23-3.86 (m, 8 H,  $-OCH_2-$ , H-2, H-3, H-4, H-5, H-6, H-6'), 4.66 (d, 1 H, H-1) ppm;  $^{13}C$ -NMR (75 MHz,  $CDCl_3$ ):  $\delta$ , 24.4, 24.5, 26.0, 28.3, 28.8, 29.0, 29.3, 61.3, 66.8, 67.7, 70.8, 71.4, 72.2, 99.9; HR-FAB MS  $[M + Na]^+$  calcd for  $C_{14}H_{28}O_6SNa^+$  347.1504, found 347.1515.

# 8-Bromooctyl 2,3,4,6-tetra-O-acetyl- $\alpha$ -D-mannopyranoside (1)

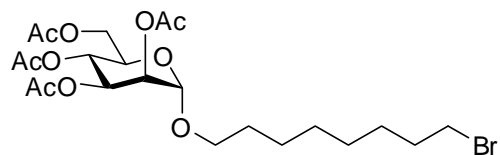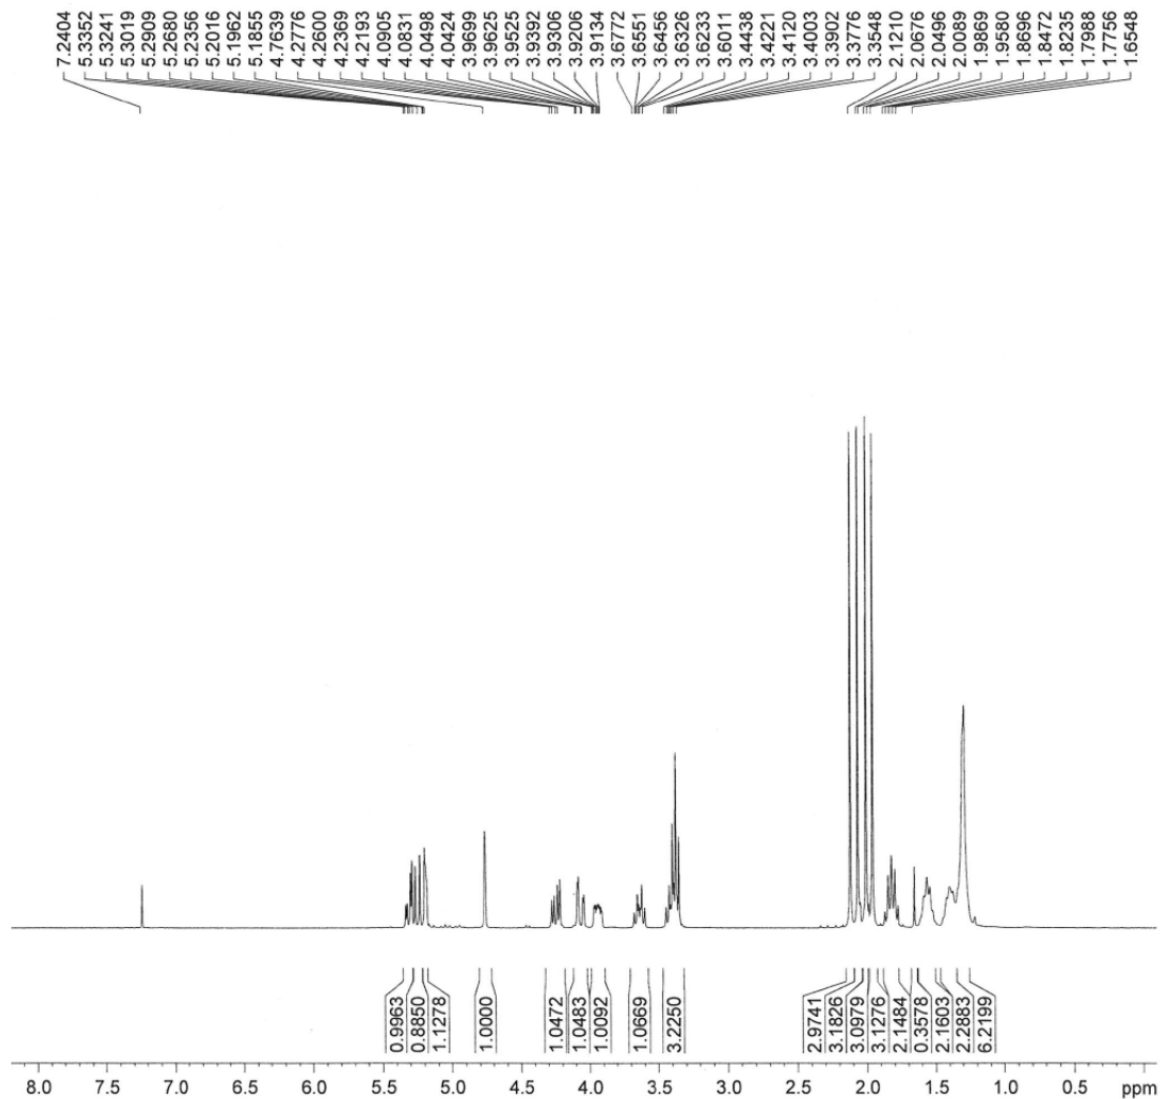

$^1\text{H-NMR}$  spectrum (300 MHz,  $\text{CDCl}_3$ )

# 8-Bromooctyl 2,3,4,6-tetra-O-acetyl- $\alpha$ -D-mannopyranoside (1)

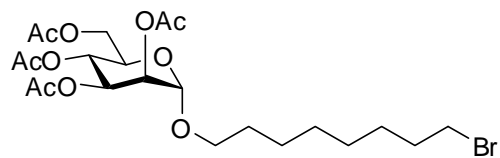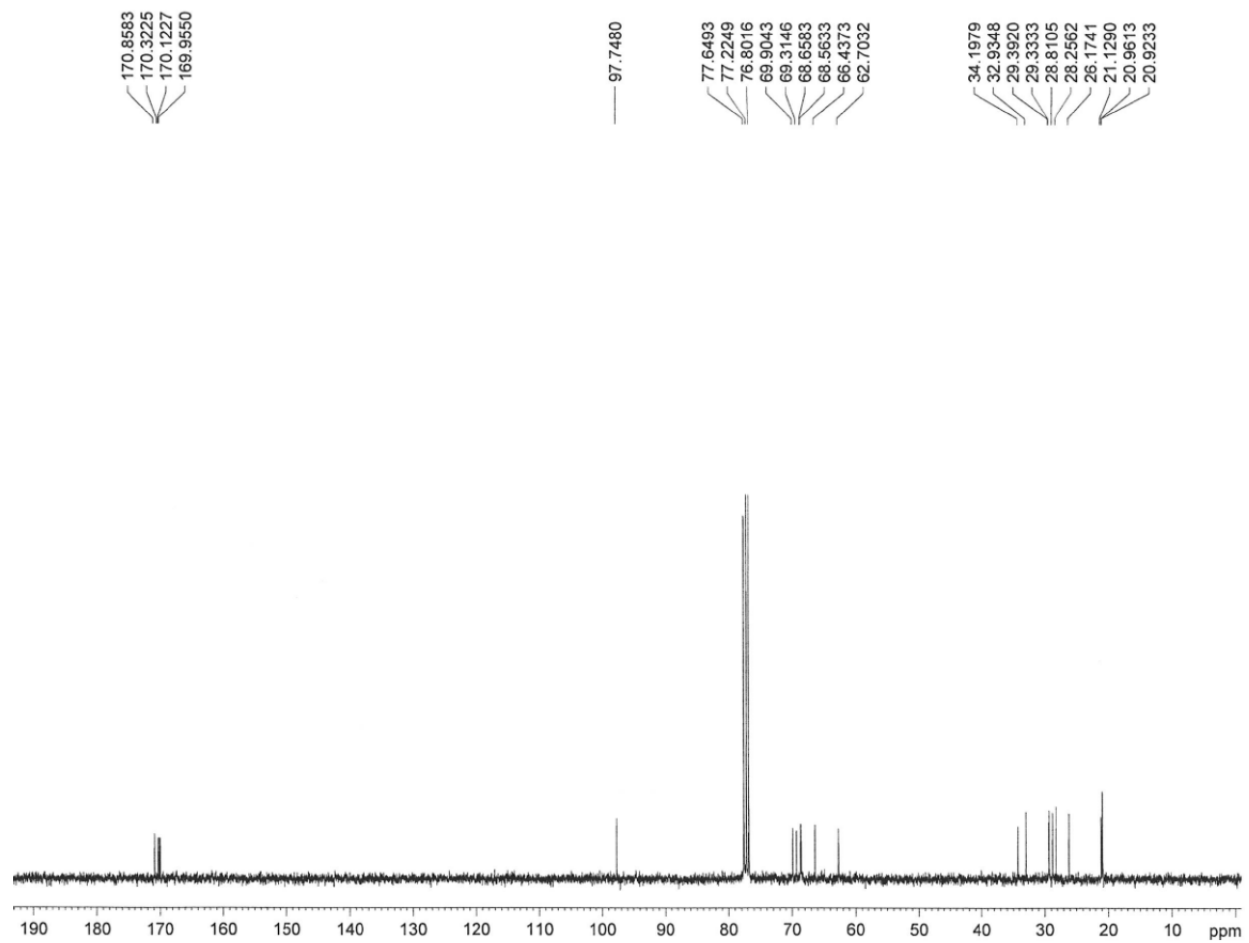

$^{13}\text{C}$ -NMR spectrum (75 MHz,  $\text{CDCl}_3$ )

# 8-(Acetylthio)octyl 2,3,4,6-tetra-O-acetyl- $\alpha$ -D-mannopyranoside (2)

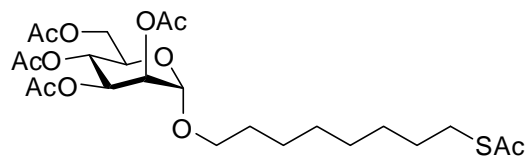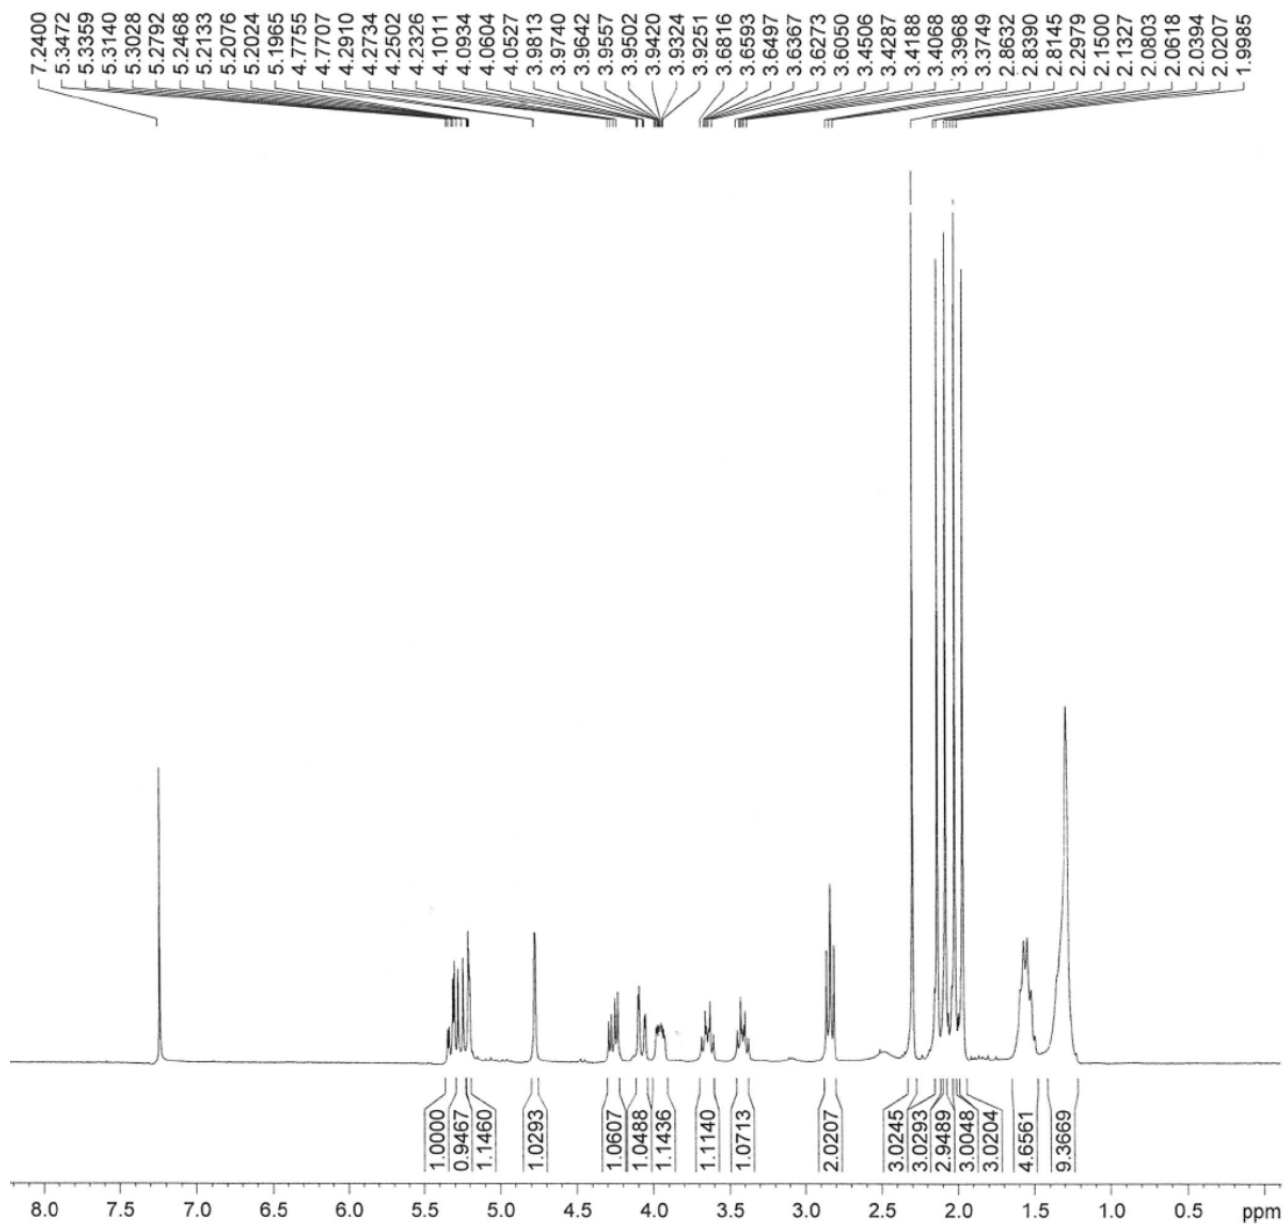

$^1\text{H-NMR}$  spectrum (300 MHz,  $\text{CDCl}_3$ )



# 8-(Acetylthio)octyl 2,3,4,6-tetra-O-acetyl- $\alpha$ -D-mannopyranoside (2)

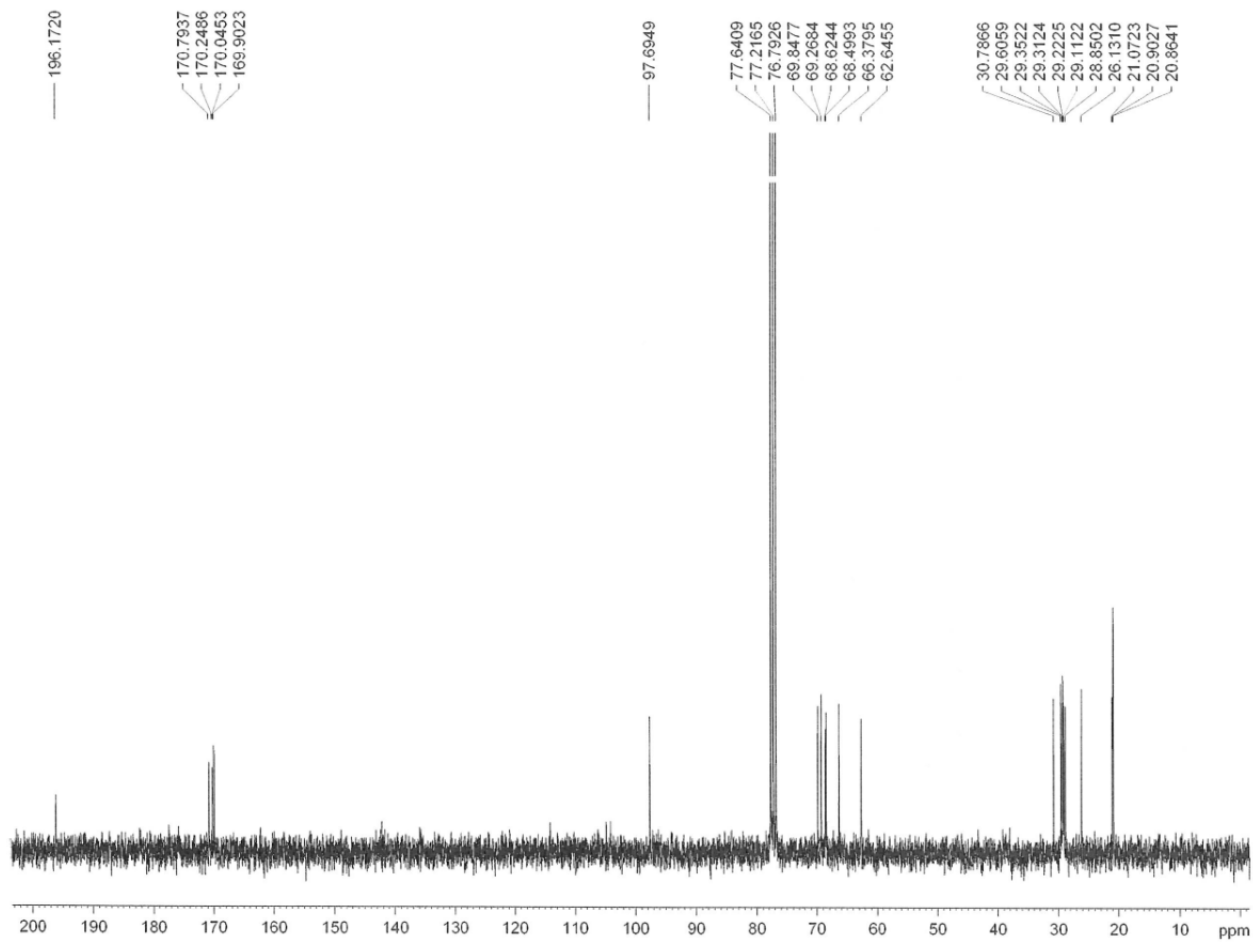

<sup>13</sup>C-NMR spectrum (75 MHz, CDCl<sub>3</sub>)

### 8-Mercaptooctyl $\alpha$ -D-mannopyranoside (3)

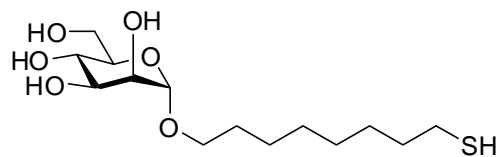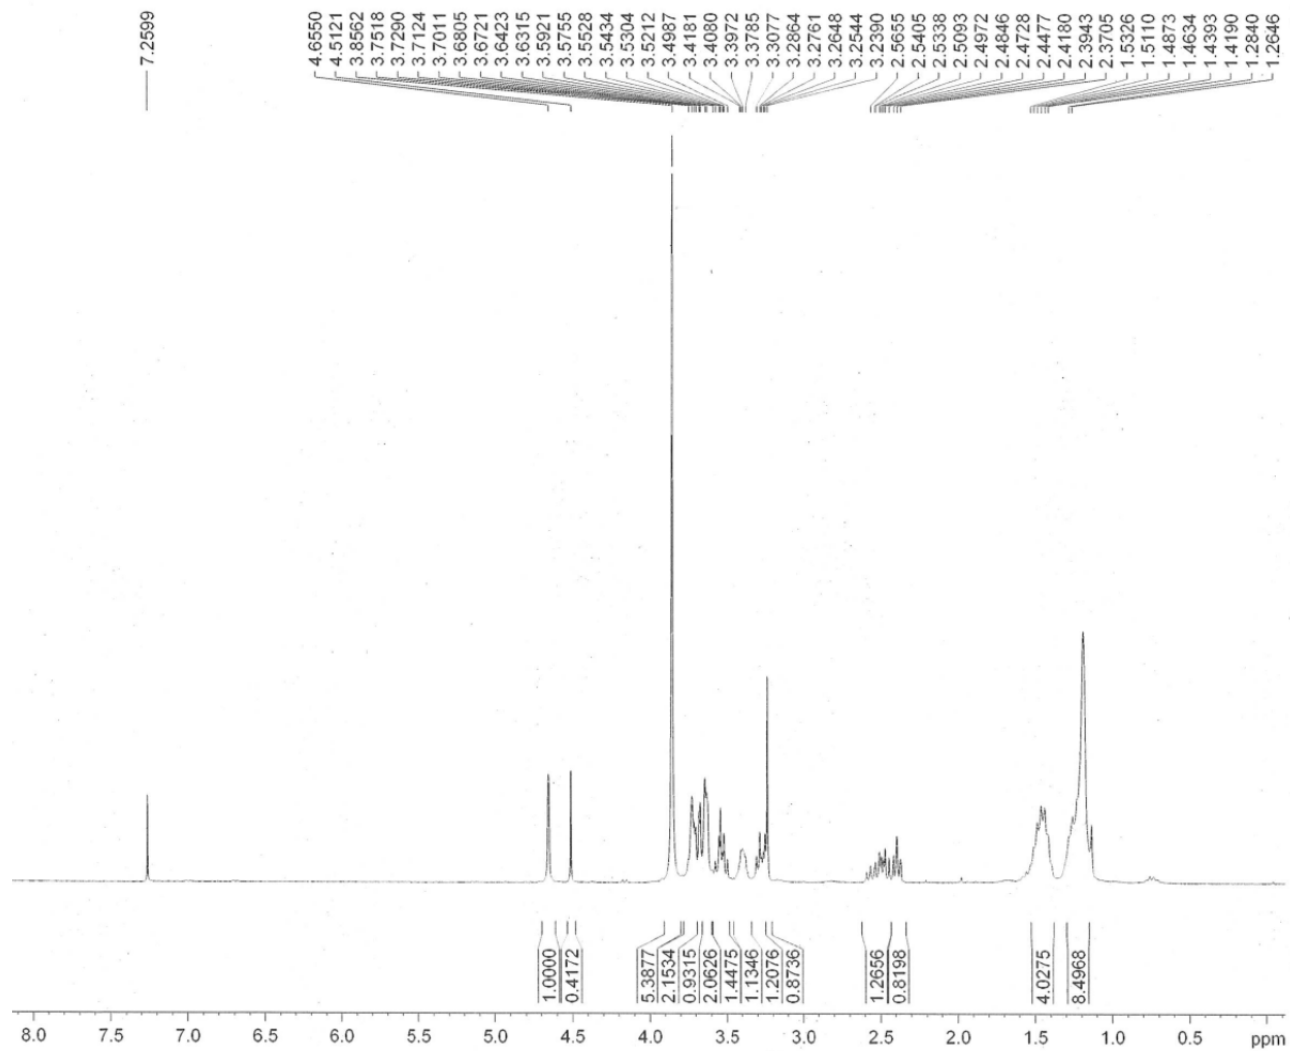

$^1\text{H-NMR}$  spectrum (300 MHz,  $\text{CDCl}_3$ )

**8-Mercaptooctyl  $\alpha$ -D-mannopyranoside (3)**

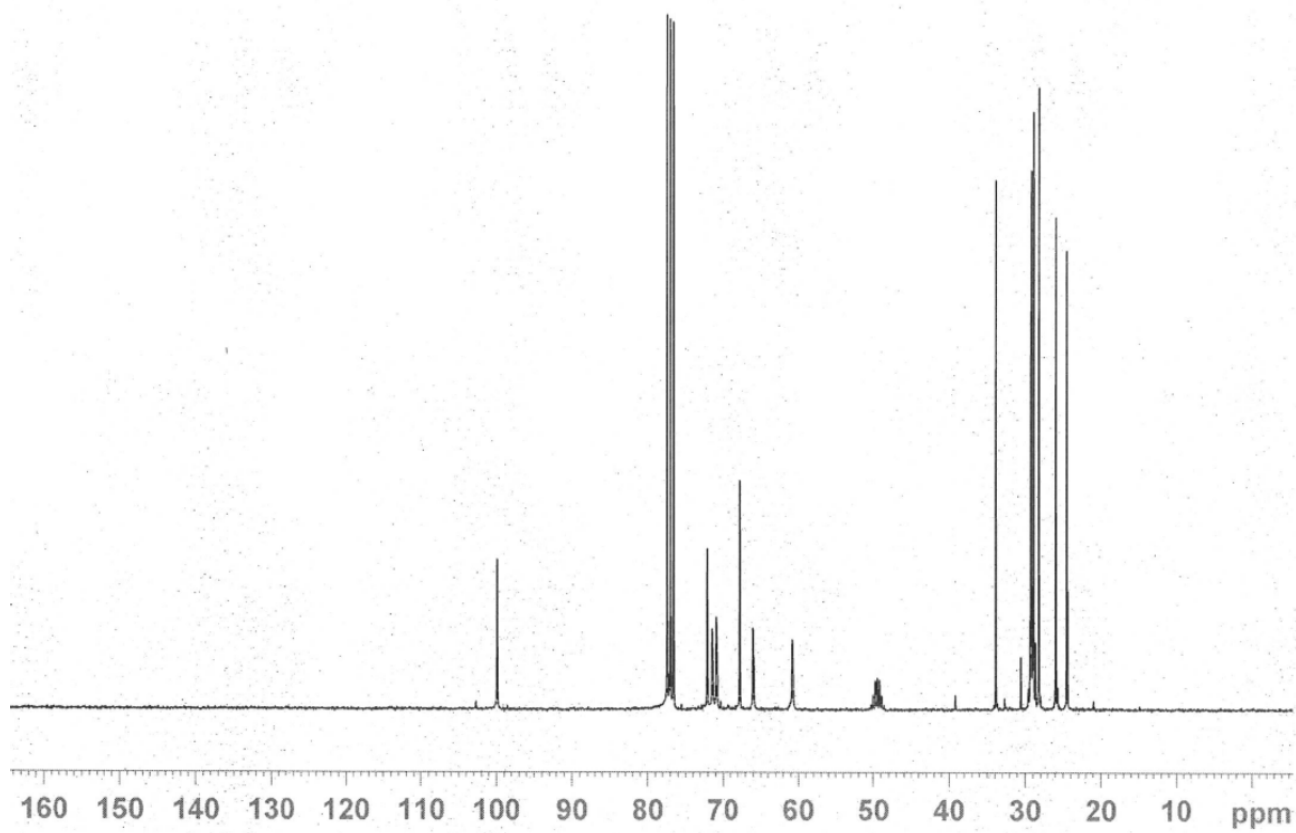

$^{13}\text{C}$ -NMR spectrum (75 MHz,  $\text{CDCl}_3$ )
